# Supplementary material for: Sphingomyelin generated by sphingomyelin synthase 1 is involved in attachment and infection with Japanese encephalitis virus
Source: Sci Rep. 2016 Nov 28;6:37829. doi: 10.1038/srep37829 (PMC5124946; doi:10.1038/srep37829)

## **Supplementary information**

### **Sphingomyelin generated by sphingomyelin synthase 1 is involved in attachment and infection with Japanese encephalitis virus**

Makoto Taniguchi<sup>1\*</sup>, Takafumi Tasaki<sup>1</sup>, Hideaki Ninomiya<sup>2</sup>, Yoshibumi Ueda<sup>3,4</sup>, Koh-ichi Kuremoto<sup>5</sup>, Susumu Mitsutake<sup>6</sup>, Yasuyuki Igarashi<sup>7</sup>, Toshiro Okazaki<sup>3</sup>, and Tsutomu Takegami<sup>1</sup>

<sup>1</sup> Department of Life Science, Medical Research Institute, <sup>2</sup> Histology Laboratory, Research Support Center, Medical Research Institute, and <sup>3</sup> Department of Hematology and Immunology, Kanazawa Medical University, 1-1 Daigaku, Uchinada, Ishikawa 920-0293, Japan

<sup>4</sup> Graduate School of Arts and Sciences, University of Tokyo, Komaba, Meguro-ku, Tokyo, 153-8902, Japan

<sup>5</sup> Department of Advanced Prosthodontics, Graduate School of Biomedical & Health Sciences, Hiroshima University, Hiroshima 734-8553, Japan

<sup>6</sup> Department of Applied Biochemistry and Food Sciences, Faculty of Agriculture, Saga University, Saga 840-8502, Japan

<sup>7</sup> Laboratory of Biomembrane and Biofunction Chemistry, Faculty of Advanced Life Sciences, Hokkaido University, Kita 21-jo, Nishi 11-chome, Kita-ku, Sapporo 001-0021, Japan

## **Supplementary Materials and Methods**

***Lentivirus infection.*** Lentivirus particles containing GFP were purchased from Santa Cruz Biotechnology (copGFP Control Lentiviral Particles, sc-108084). WT and SMS DKO tMEFs were seeded on 6 well plate and pre-treated with 1 µg/mL polybrene (Santa Cruz Biotechnology) for 20 min at 37°C. Cells were infected for 1 h at 1 MOI, washed with PBS, and cultured. After 48 h infection, GFP-positive cells were observed with fluorescent microscopy BZ-9000 (KEYENCE, Osaka, Japan) and analysed with Gallios (Beckman).

## **Supplementary Figure Legends**

### **Supplementary Figure S1. Measurement of SM and ceramide after treatment with BSM in WT and SMS DKO tMEFs.**

WT and SMS DKO tMEFs were treated with 20 mU/mL BSM for 10 min and then harvested after washing. SM **(a)** and ceramide **(b)** levels were assessed by LC-MS/MS and normalized with total PC amounts. The value presented is the mean  $\pm$  SD (n = 3). \*  $P < 0.005$ .

### **Supplementary Figure S2. Lentivirus infection in WT and SMS DKO tMEFs.**

WT and SMS DKO tMEFs were infected for 1 h at 1 MOI. After removing unbound lentivirus, cells were cultured for 48 h. **(a)** Cells were observed with fluorescent microscopy, Scale bars, 20  $\mu$ m. **(b)** Flowcytometry analysis of GFP-positive cells. The value presented is the mean  $\pm$  SD (n = 3). \*  $P < 0.005$ .

### **Supplementary Figure S3.**

(a) Full-length blots of Figure 2(a). (b) Full-length blots of Figure 2(g). (c) Full-length blots of Figure 2(j). (d) Full-length blots of Figure 2(k).

### **Supplementary Figure S4.**

Full-length blots for main figures corresponded to Figure 3(a).

### **Supplementary Figure S5.**

(a) Full-length blots of Figure 4(e). (b) Full-length blots of Figure 4(f).

### **Supplementary Figure S6.**

Full-length blots for main figures corresponded to Figure 5(b).

(a)

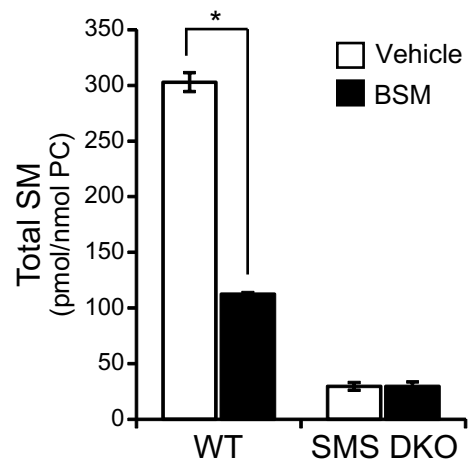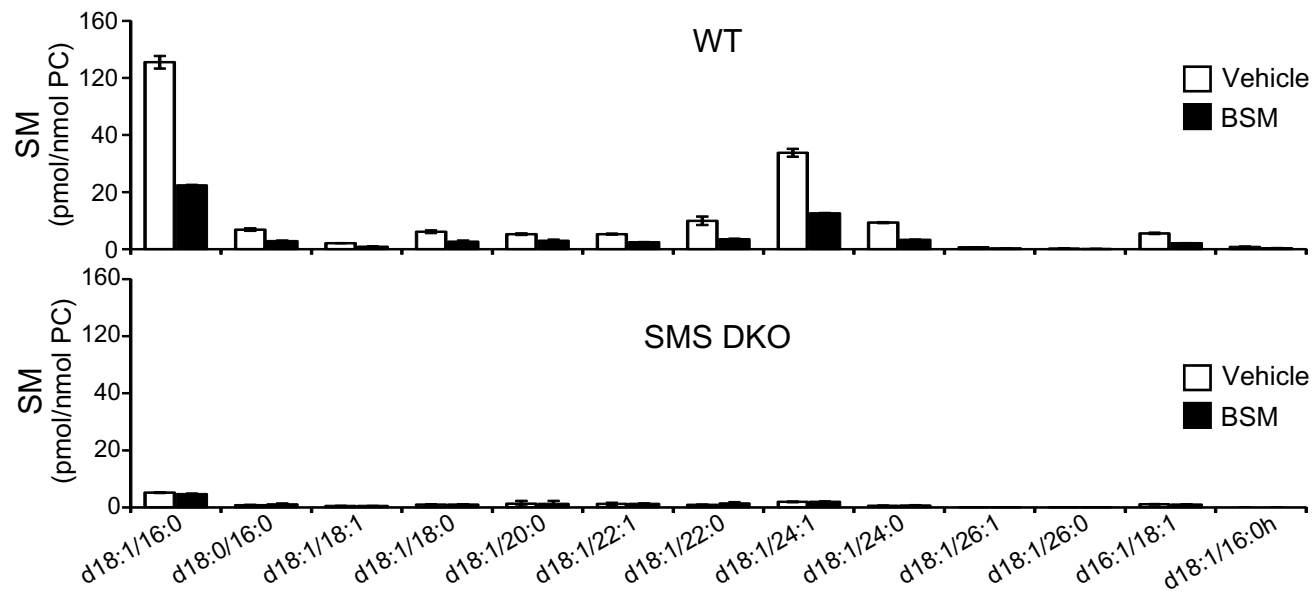

(b)

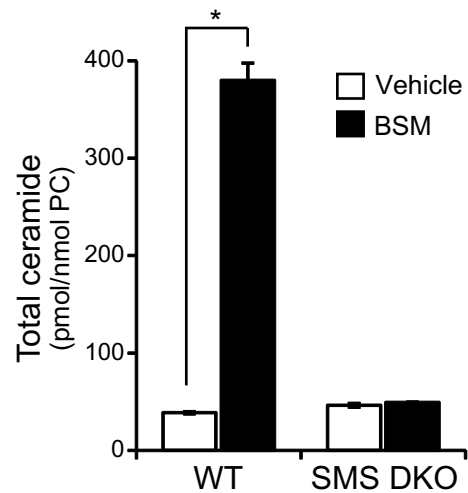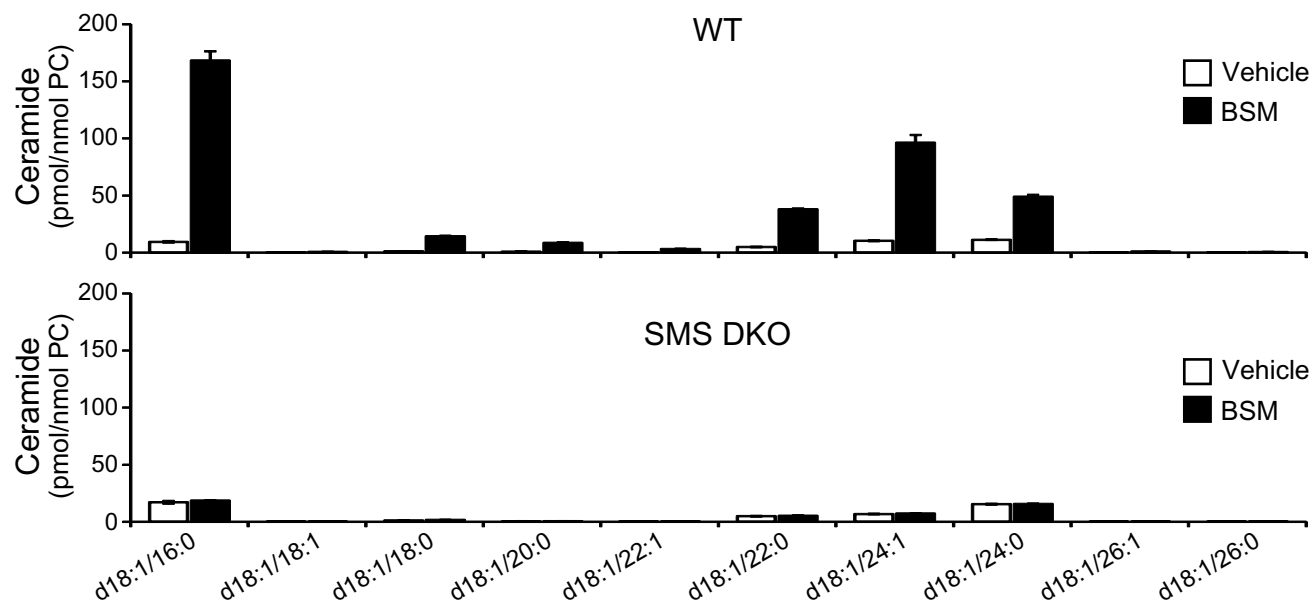

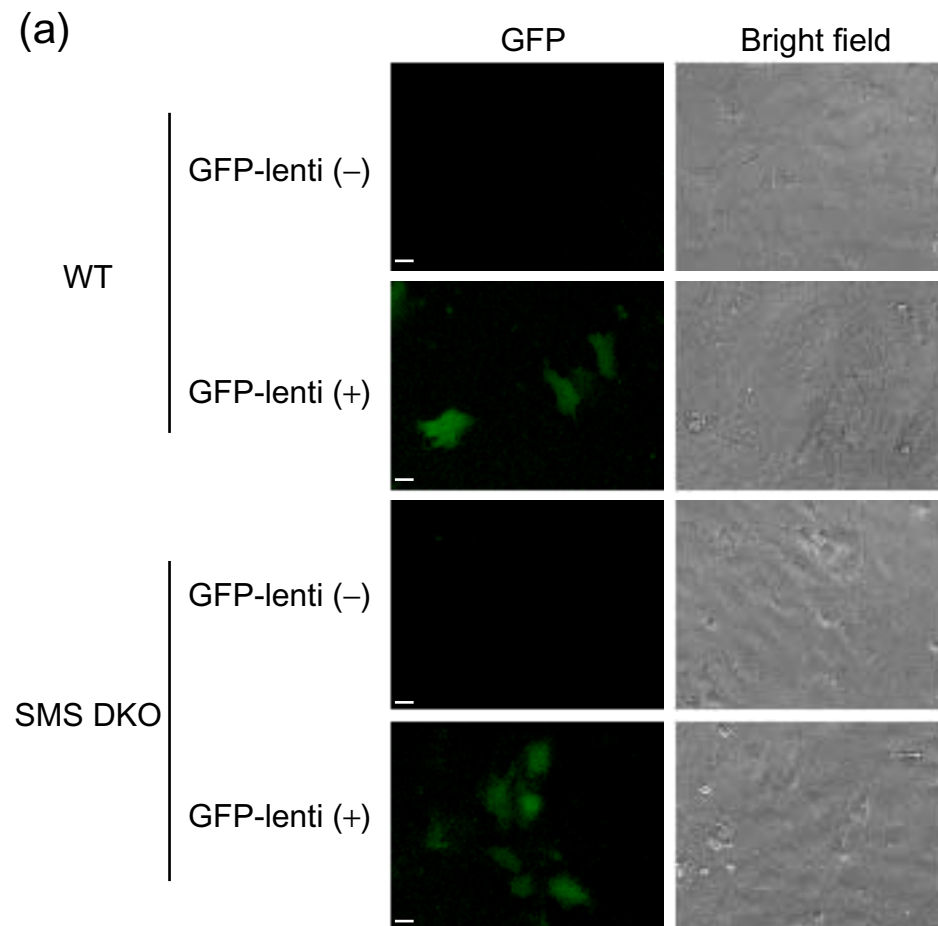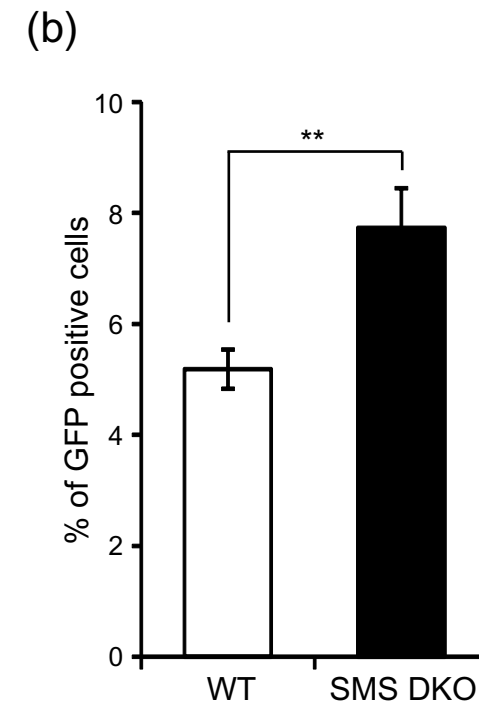

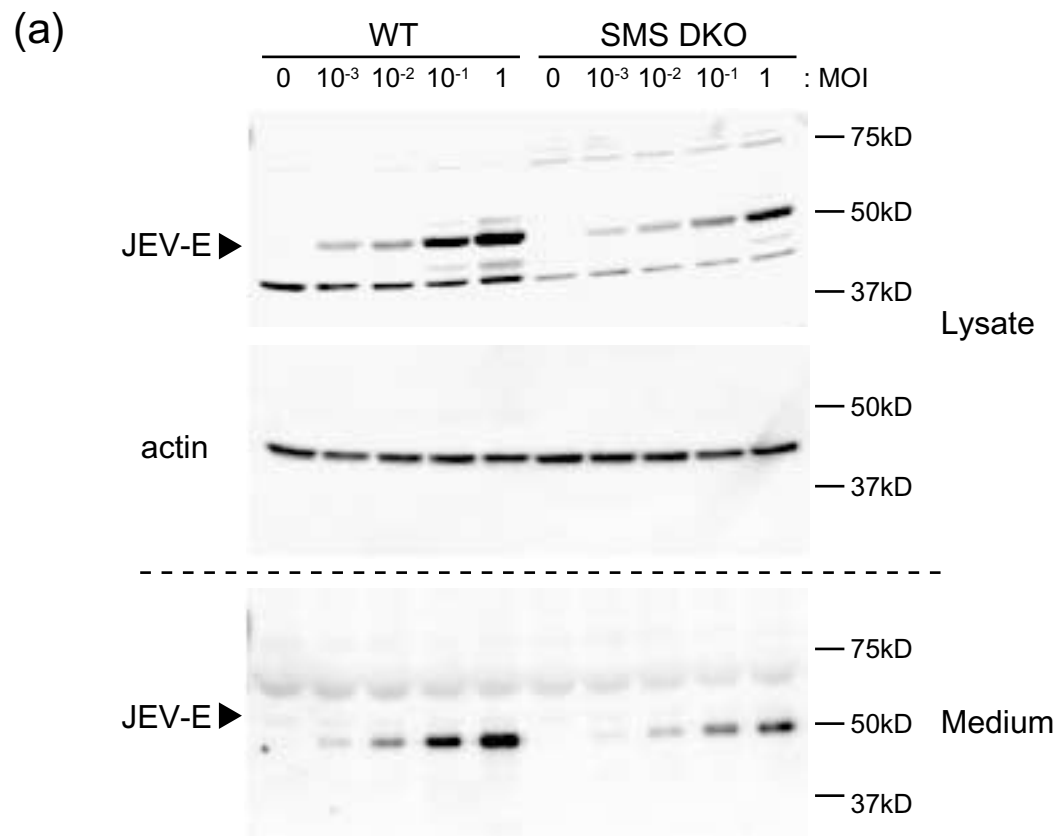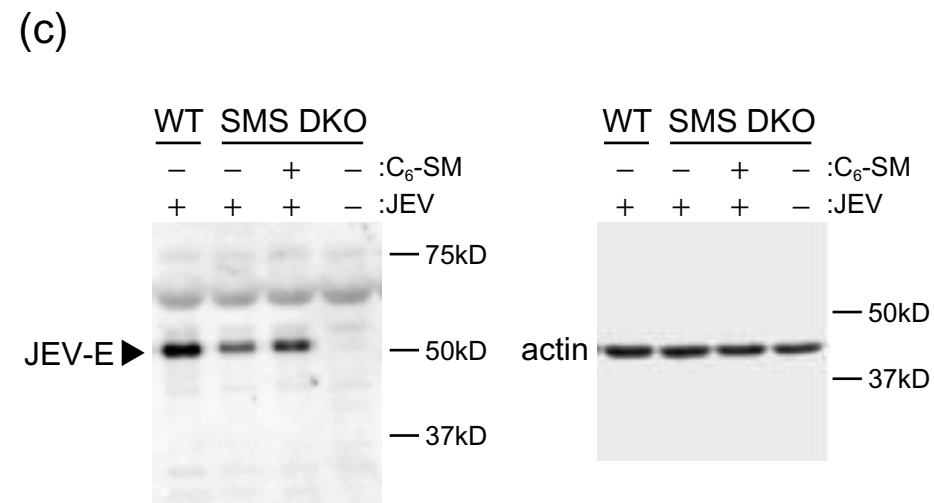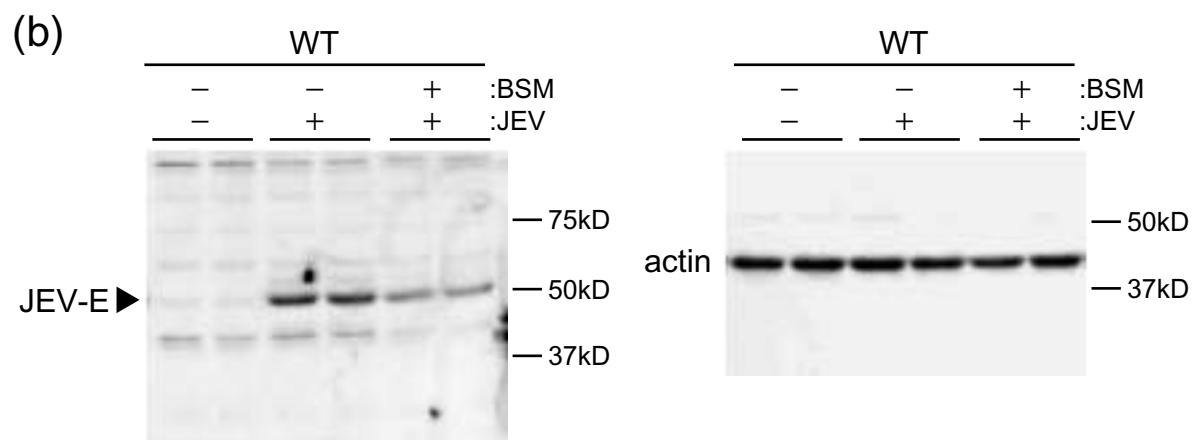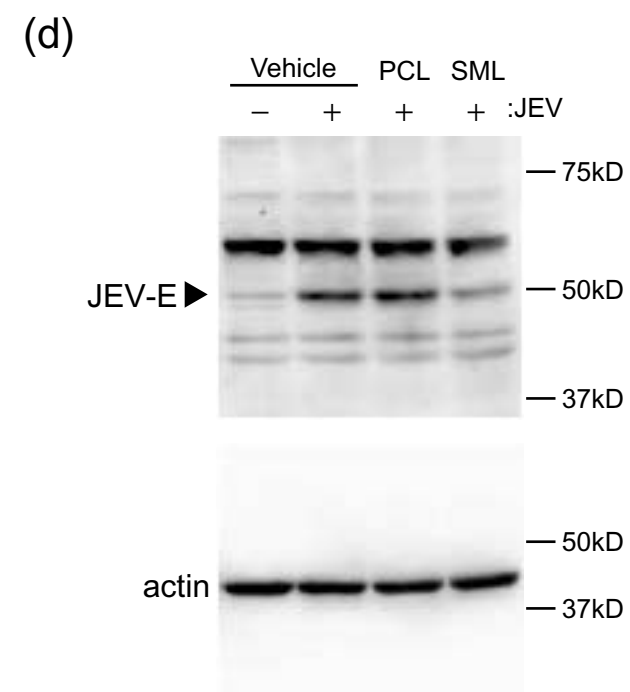

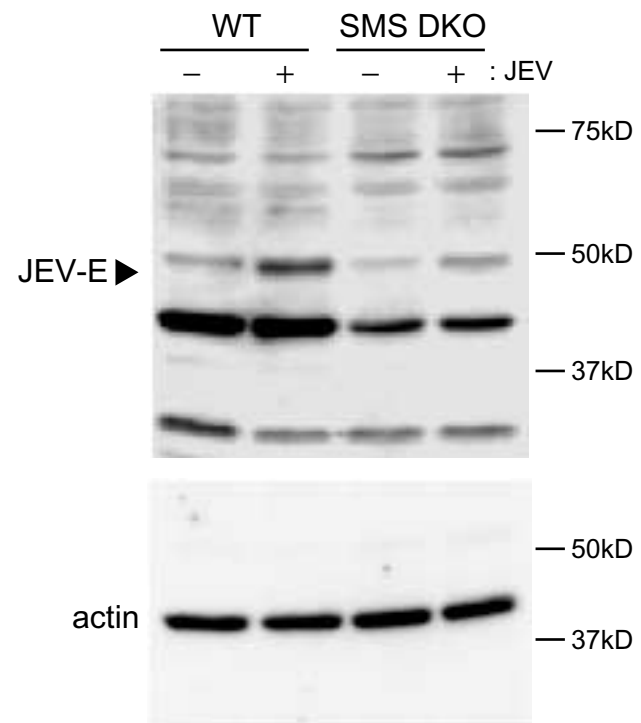

(a)

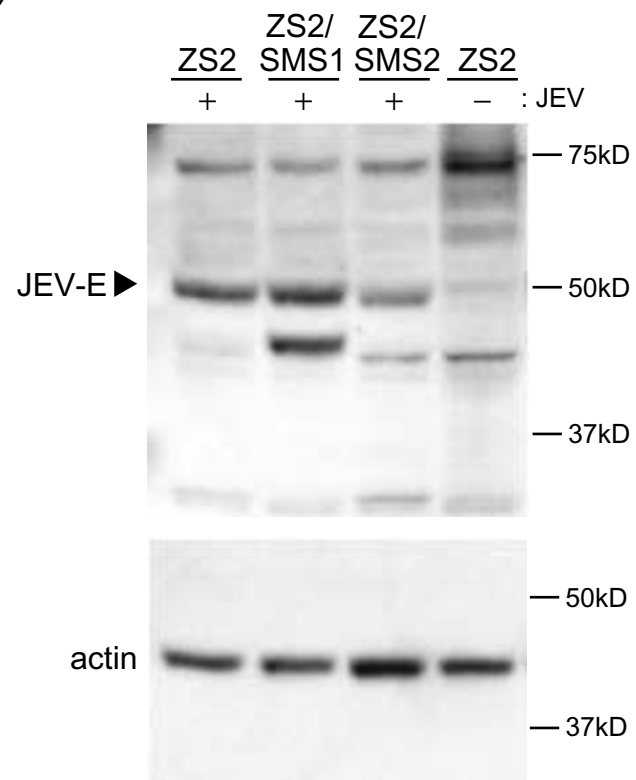

(b)

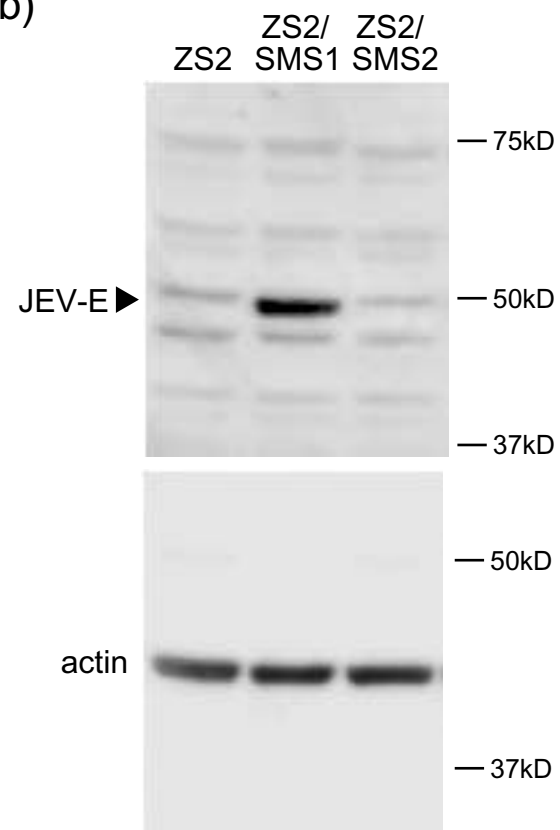

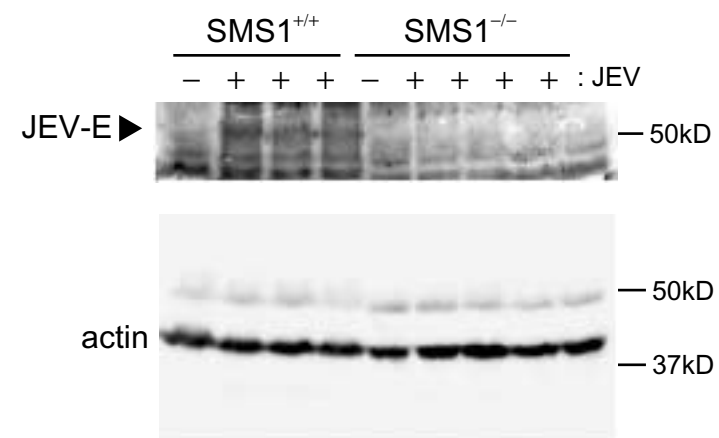

Supplement: Supplementary Information [file srep37829-s1.pdf]
